# Supplementary material for: Two three-dimensional cadmium(ii) coordination polymers based on 5-amino-tetrazolate and 1,2,4,5-benzenetetracarboxylate: the pH value controlled syntheses, crystal structures and luminescent properties
Source: Royal Society of Chemistry journal article supplement (doi:10.1039/c4ce00219a), 2014-01-01
Supplement: c4ce00219a1.pdf [file c4ce00219a1.pdf]

Electronic supporting information (ESI)

**Two three-dimensional cadmium(II) coordination polymers  
based on 5-amino-tetrazolate and 1,2,4,5-  
benzenetetracarboxylate: pH value controlled syntheses,  
crystal structures, and luminescent properties**

Di-Chang Zhong,\* Wen-Guan Lu,\* Ji-Hua Deng

**Table S1.** Selected Bond Lengths (Å) and Angles (°) for **1** and **2**<sup>a</sup>

| <b>CP 1</b>       |            |                   |            |                   |            |
|-------------------|------------|-------------------|------------|-------------------|------------|
| Cd(1)-N(2)        | 2.210(4)   | Cd(1)-O(2)        | 2.292(3)   | Cd(1)-O(3B)       | 2.387(3)   |
| Cd(1)-O(4A)       | 2.243(3)   | Cd(1)-O(1W)       | 2.312(4)   | Cd(1)-O(1)        | 2.429(3)   |
| N(2)-Cd(1)-O(4A)  | 98.05(12)  | O(2)-Cd(1)-O(1W)  | 87.00(16)  | N(2)-Cd(1)-O(1)   | 106.55(11) |
| N(2)-Cd(1)-O(2)   | 162.26(11) | N(2)-Cd(1)-O(3B)  | 87.46(12)  | O(4A)-Cd(1)-O(1)  | 153.96(11) |
| O(4A)-Cd(1)-O(2)  | 99.29(11)  | O(4A)-Cd(1)-O(3B) | 74.98(10)  | O(2)-Cd(1)-O(1)   | 55.75(10)  |
| N(2)-Cd(1)-O(1W)  | 93.81(17)  | O(2)-Cd(1)-O(3B)  | 93.41(11)  | O(1W)-Cd(1)-O(1)  | 87.32(15)  |
| O(4A)-Cd(1)-O(1W) | 99.61(14)  | O(1W)-Cd(1)-O(3B) | 174.57(14) | O(3B)-Cd(1)-O(1)  | 97.39(10)  |
| <b>CP 2</b>       |            |                   |            |                   |            |
| Cd(1)-N(5)        | 2.250(4)   | Cd(2)-O(9)        | 2.218(4)   | Cd(3)-O(9B)       | 2.243(4)   |
| Cd(1)-O(8A)       | 2.255(4)   | Cd(2)-N(2C)       | 2.291(4)   | Cd(3)-O(9F)       | 2.294(3)   |
| Cd(1)-O(1)        | 2.348(3)   | Cd(2)-O(6D)       | 2.296(3)   | Cd(3)-O(4B)       | 2.295(4)   |
| Cd(1)-O(5B)       | 2.367(4)   | Cd(2)-O(1W)       | 2.357(4)   | Cd(3)-O(2W)       | 2.319(4)   |
| Cd(1)-O(7B)       | 2.400(4)   | Cd(2)-O(1)        | 2.420(3)   | Cd(3)-O(3G)       | 2.345(4)   |
| Cd(1)-O(2)        | 2.490(3)   | Cd(2)-O(3E)       | 2.454(4)   | Cd(3)-N(3)        | 2.392(5)   |
| N(5)-Cd(1)-O(8A)  | 108.58(15) | O(9)-Cd(2)-N(2C)  | 94.25(15)  | O(9B)-Cd(3)-O(9F) | 82.37(14)  |
| N(5)-Cd(1)-O(1)   | 128.98(15) | O(9)-Cd(2)-O(6D)  | 97.22(14)  | O(9B)-Cd(3)-O(4B) | 100.78(13) |
| O(8A)-Cd(1)-O(1)  | 95.47(13)  | N(2C)-Cd(2)-O(6D) | 159.60(14) | O(9F)-Cd(3)-O(4B) | 166.41(15) |
| N(5)-Cd(1)-O(5B)  | 87.81(14)  | O(9)-Cd(2)-O(1W)  | 175.30(13) | O(9B)-Cd(3)-O(2W) | 172.50(16) |
| O(8A)-Cd(1)-O(5B) | 160.28(12) | N(2C)-Cd(2)-O(1W) | 86.95(15)  | O(9F)-Cd(3)-O(2W) | 91.73(15)  |
| O(1)-Cd(1)-O(5B)  | 81.73(12)  | O(6D)-Cd(2)-O(1W) | 80.33(13)  | O(4B)-Cd(3)-O(2W) | 86.03(15)  |
| N(5)-Cd(1)-O(7B)  | 99.39(14)  | O(9)-Cd(2)-O(1)   | 93.00(13)  | O(9B)-Cd(3)-O(3G) | 95.90(13)  |
| O(8A)-Cd(1)-O(7B) | 90.26(13)  | N(2C)-Cd(2)-O(1)  | 91.04(13)  | O(9F)-Cd(3)-O(3G) | 73.71(13)  |
| O(1)-Cd(1)-O(7B)  | 125.46(12) | O(6D)-Cd(2)-O(1)  | 71.61(12)  | O(4B)-Cd(3)-O(3G) | 92.77(13)  |
| O(5B)-Cd(1)-O(7B) | 75.93(13)  | O(1W)-Cd(2)-O(1)  | 82.43(13)  | O(2W)-Cd(3)-O(3G) | 86.83(16)  |
| N(5)-Cd(1)-O(2)   | 166.08(14) | O(9)-Cd(2)-O(3E)  | 72.91(13)  | O(9B)-Cd(3)-N(3)  | 89.25(14)  |
| O(8A)-Cd(1)-O(2)  | 83.30(12)  | N(2C)-Cd(2)-O(3E) | 82.47(13)  | O(9F)-Cd(3)-N(3)  | 100.86(14) |
| O(1)-Cd(1)-O(2)   | 54.39(12)  | O(6D)-Cd(2)-O(3E) | 117.03(11) | O(4B)-Cd(3)-N(3)  | 92.43(14)  |
| O(5B)-Cd(1)-O(2)  | 79.22(12)  | O(1W)-Cd(2)-O(3E) | 111.77(13) | O(2W)-Cd(3)-N(3)  | 87.31(17)  |
| O(7B)-Cd(1)-O(2)  | 72.72(11)  | O(1)-Cd(2)-O(3E)  | 163.89(13) | O(3G)-Cd(3)-N(3)  | 171.88(14) |

<sup>a</sup> Symmetry transformations used to generate equivalent atoms: A -x, -y+1, -z; B -x, y, -z+1/2 for **1**.

A -x+1, -y, -z; B x, y+1, z; C x, y-1, z; D x-1, y+1, z; E x-1, y, z; F -x, -y+1, -z+1; G -x+1, -y+1, -z+1 for **2**.

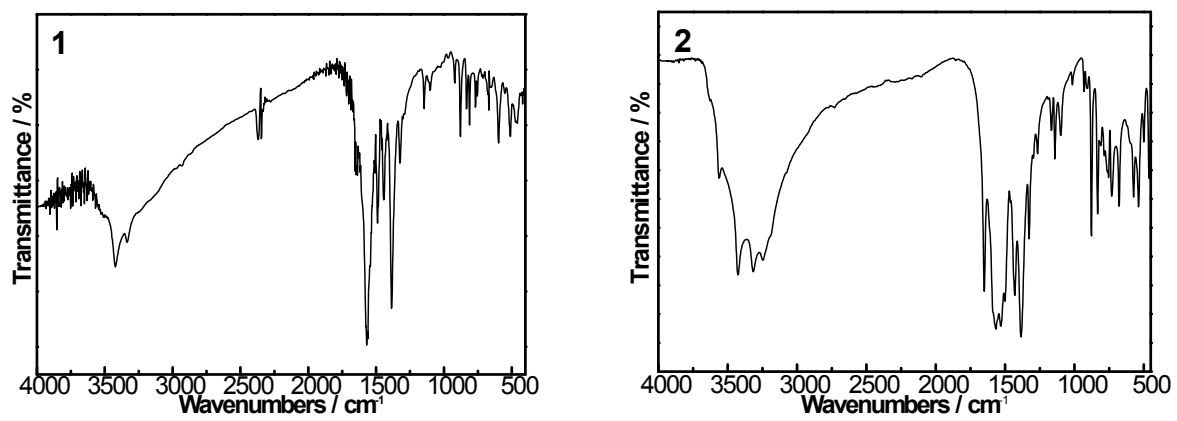

**Fig. S1.** IR spectra of **1** and **2**

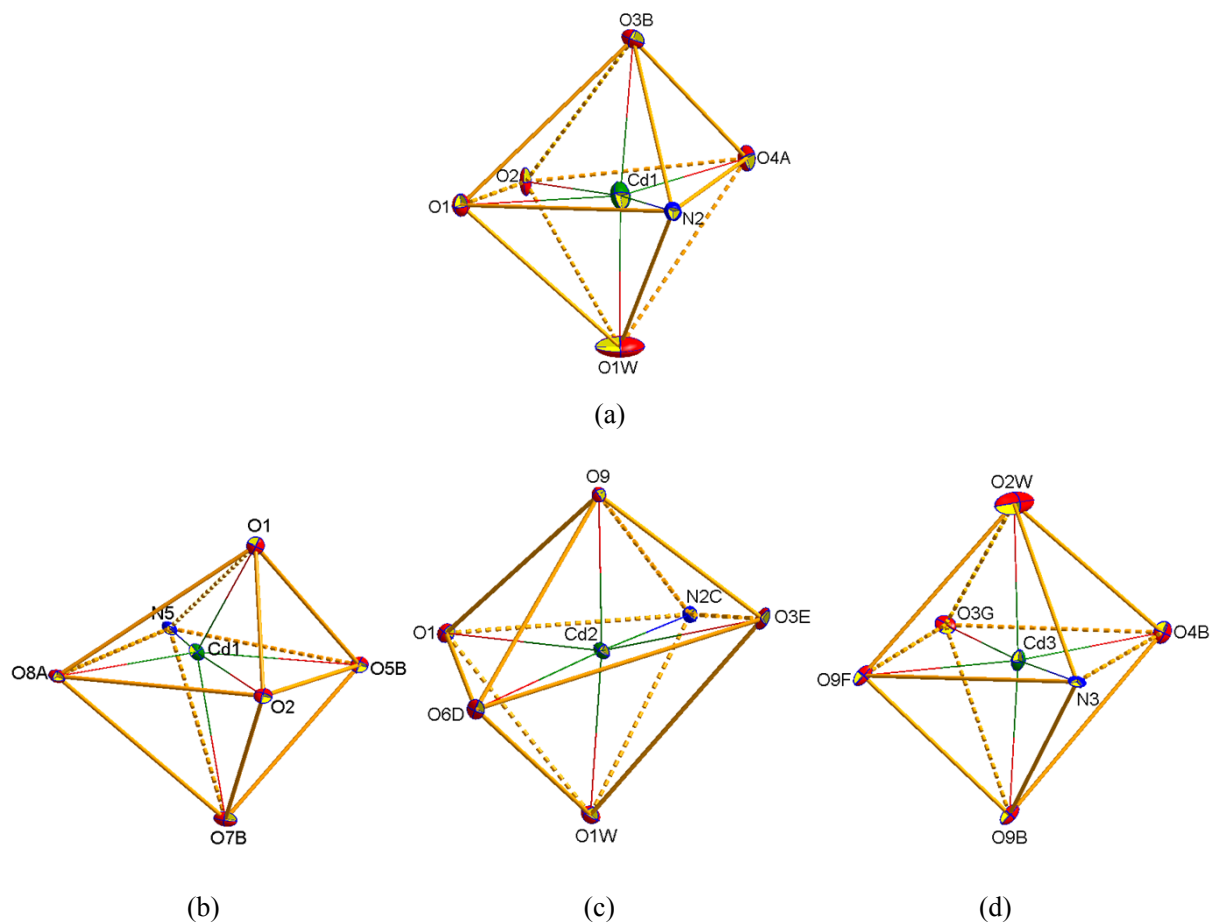

**Fig. S2** The coordination polyhedra of Cd(II) ions in **1** (a) and **2** (b, c, and d).

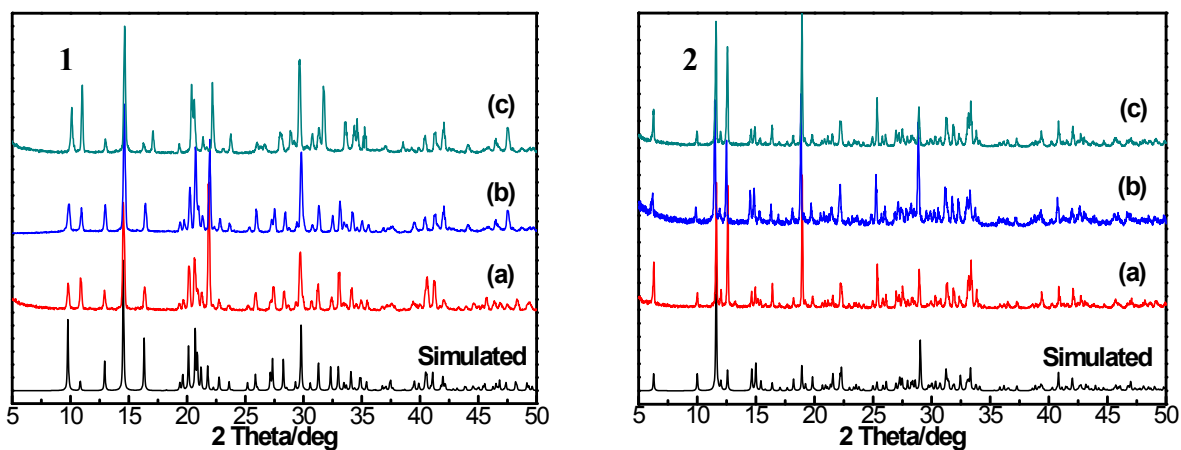

**Fig. S3.** The powder X-ray diffraction patterns for **1** and **2**, the bulk of samples were synthesized from (a)  $\text{Cd}(\text{NO}_3)_2$ , (b)  $\text{CdCl}_2$ , and (c)  $\text{Cd}(\text{Ac})_2$  (the simulated PXRD patterns are generated from the corresponding single-crystal diffraction data).
